# Supplementary material for: An impedimetric immunosensor for diagnosis of Brazilian spotted fever in blood plasma
Source: Royal Society of Chemistry journal article supplement (doi:10.1039/d3ay01308a), 2023-11-22
Supplement: d3ay01308a1.pdf [file d3ay01308a1.pdf]

**Table S1.** Effect of CAS blocking at the bare electrode on the signal stabilization using different incubation times of capybara IgG.

| Time (min) | Rct(k $\Omega$ )    |                                     |                                        |
|------------|---------------------|-------------------------------------|----------------------------------------|
|            | <sup>A</sup> GCE:Ag | <sup>A</sup> GCE <sup>CAS</sup> :Ag | <sup>A</sup> GCE/Ab <sup>CAS</sup> :Ag |
| 0          | 0.034               | 0.185                               | 0.268                                  |
| 5          | 0.045               | 0.424                               | 0.570                                  |
| 10         | 0.052               | 0.486                               | 0.643                                  |
| 15         | 0.084               | 0.493                               | 0.684                                  |
| 20         | 0.099               | 0.491                               | 0.691                                  |

**Table S2.** Statistical analysis of the obtained results.

| Test                                 | $\alpha = 0.05$    |                       |
|--------------------------------------|--------------------|-----------------------|
|                                      | Significance level | P-value               |
| F Test Anova slope                   | < 0.05             | 2.5097 <sup>-31</sup> |
| T Test of Student Linear coefficient | > 0.05             | 0.1232                |
| Shapiro-Wilk waste normality         | > 0.05             | 0.2472                |
| Breusch Pagan homoscedasticity       | > 0.05             | 0.6270                |

As the p-value (0) found in the ANOVA F test is less than 0.05, we reject the null hypothesis (zero slope) at the significance level of 5%, whereas the p-value of 0.1232 of the t-test is greater than 0.05, therefore, we do not reject the null hypothesis (intercept equal to zero) at the significance level of 5%. The correlation coefficient found of 0.99 is satisfactory, so we conclude that there is an adequate linear relationship, as the p-value of 0.6270 of the Breusch Pagan Test is greater than 0.05, we do not reject the hypothesis of equality of variances at the level of significance. of 5%, therefore, we have a homoscedastic model, finally, as the p-value of 0.2472 of the Shapiro-Wilk test is greater than 0.05, we do not reject the hypothesis of normality of residues at the level of significance of 5%.
